# Supplementary material for: Transcriptional and epigenetic changes during tomato yellow leaf curl virus infection in tomato
Source: Springer Nature journal article supplement (doi:10.1186/s12870-023-04534-y), 2023-12-18
Supplement: 12870_2023_4534_MOESM2_ESM.pdf [file 12870_2023_4534_MOESM2_ESM.pdf]

**A**

| <i>dpi</i> | <i>Symptoms</i> |              |
|------------|-----------------|--------------|
|            | <i>mock</i>     | <i>TYLCV</i> |
| 2          | 0               | 0            |
| 7          | 0               | 1,5-2        |
| 10         | 0               | 3            |
| 14         | 0               | 4            |
| 21         | 0               | 5            |

**B**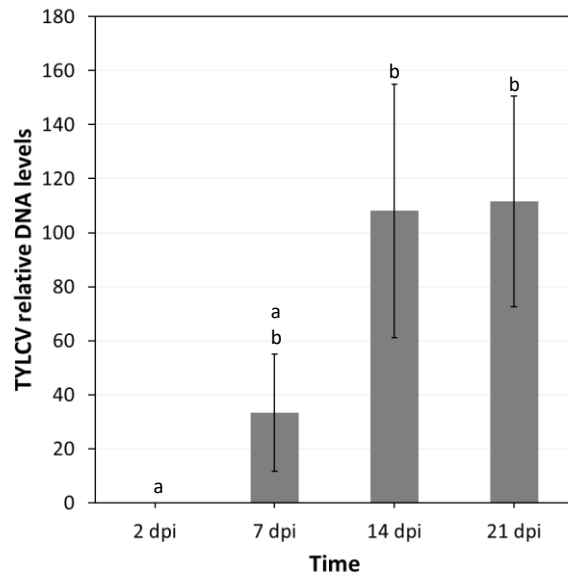

**Additional file 2: Fig. S2. TYLCV accumulation and symptoms development in tomato plants during the infection.** A) Symptoms development in control and TYLCV infected plants at 2, 7, 14 and 21 dpi. Symptoms scale: 0-No symptoms, 1-Slight yellowing (very mild symptoms); 2-Slight leaf curling and more yellowing (mild symptoms); 3- Strong yellowing, curling and slight cupping (moderate symptoms); 4- Stunting and strong curling and cupping; (severe symptoms); 5- Severe stunting, plant growth inhibition (very severe symptoms). B) Relative accumulation of TYLCV DNA in infected plants at 2, 7, 14 and 21 dpi. One-way ANOVA comparisons (Tukey's multiple comparisons test) shows statistically significant difference between the time points labelled with "a" and "b" (alpha 0.05).
