# Supplementary material for: Transcriptional and epigenetic changes during tomato yellow leaf curl virus infection in tomato
Source: Springer Nature journal article supplement (doi:10.1186/s12870-023-04534-y), 2023-12-18
Supplement: 12870_2023_4534_MOESM3_ESM.pdf [file 12870_2023_4534_MOESM3_ESM.pdf]

**Upregulated genes at 21 dpi (TYLCV/mock)**  
**PANTHER GO. Slim Biological Process**

|                                                                                           | <i>GO terms</i> | <i>Ref-list<br/>(34652)</i> | <i>UP<br/>genes</i> | <i>Expect.</i> | <i>Fold<br/>enrich.</i> | <i>raw<br/>P-value</i> | <i>FDR</i> |
|-------------------------------------------------------------------------------------------|-----------------|-----------------------------|---------------------|----------------|-------------------------|------------------------|------------|
| Modification-dependent protein catabolic process                                          | GO:0019941      | 308                         | 65                  | 37.6           | 1.73                    | 1.51E-04               | 2.60E-03   |
| Ubiquitin-dependent protein catabolic process                                             | GO:0006511      | 291                         | 61                  | 35.52          | 1.72                    | 2.74E-04               | 3.99E-03   |
| Ubiquitin-dependent protein catabolic process via the multivesicular body sorting pathway | GO:0043162      | 11                          | 9                   | 1.34           | 6.7                     | 1.16E-04               | 2.15E-03   |
| Vesicle-mediated transport                                                                | GO:0016192      | 358                         | 84                  | 43.7           | 1.92                    | 4.40E-07               | 1.52E-05   |
| Multivesicular body sorting pathway                                                       | GO:0071985      | 27                          | 14                  | 3.3            | 4.25                    | 6.44E-05               | 1.39E-03   |
| Process utilizing autophagic mechanism                                                    | GO:0061919      | 45                          | 14                  | 5.49           | 2.55                    | 4.83E-03               | 3.64E-02   |
| Autophagy                                                                                 | GO:0006914      | 45                          | 14                  | 5.49           | 2.55                    | 4.83E-03               | 3.66E-02   |
| Autophagy of mitochondrion                                                                | GO:0000422      | 14                          | 9                   | 1.71           | 5.27                    | 4.15E-04               | 5.32E-03   |
| Autophagosome assembly                                                                    | GO:0000045      | 23                          | 10                  | 2.81           | 3.56                    | 2.01E-03               | 1.84E-02   |

**Additional file 3: Fig. S3. Functional enrichment of upregulated genes upon TYLCV infection at 21 dpi.** Gene ontology (GO) analysis of upregulated genes at 21 dpi (4980 genes with a ratio  $\geq 1.5$ -fold, FDR adjusted p-value  $\leq 0.05$ , when comparing TYLCV-infected samples versus mock samples) using the PANTHER GO-Slim biological process (statistical overrepresentation test). Only selected statistically significant biological processes are shown (FDR adjusted p-value  $p \leq 0.05$ ).
