# Supplementary material for: Transcriptional and epigenetic changes during tomato yellow leaf curl virus infection in tomato
Source: Springer Nature journal article supplement (doi:10.1186/s12870-023-04534-y), 2023-12-18
Supplement: 12870_2023_4534_MOESM5_ESM.pdf [file 12870_2023_4534_MOESM5_ESM.pdf]

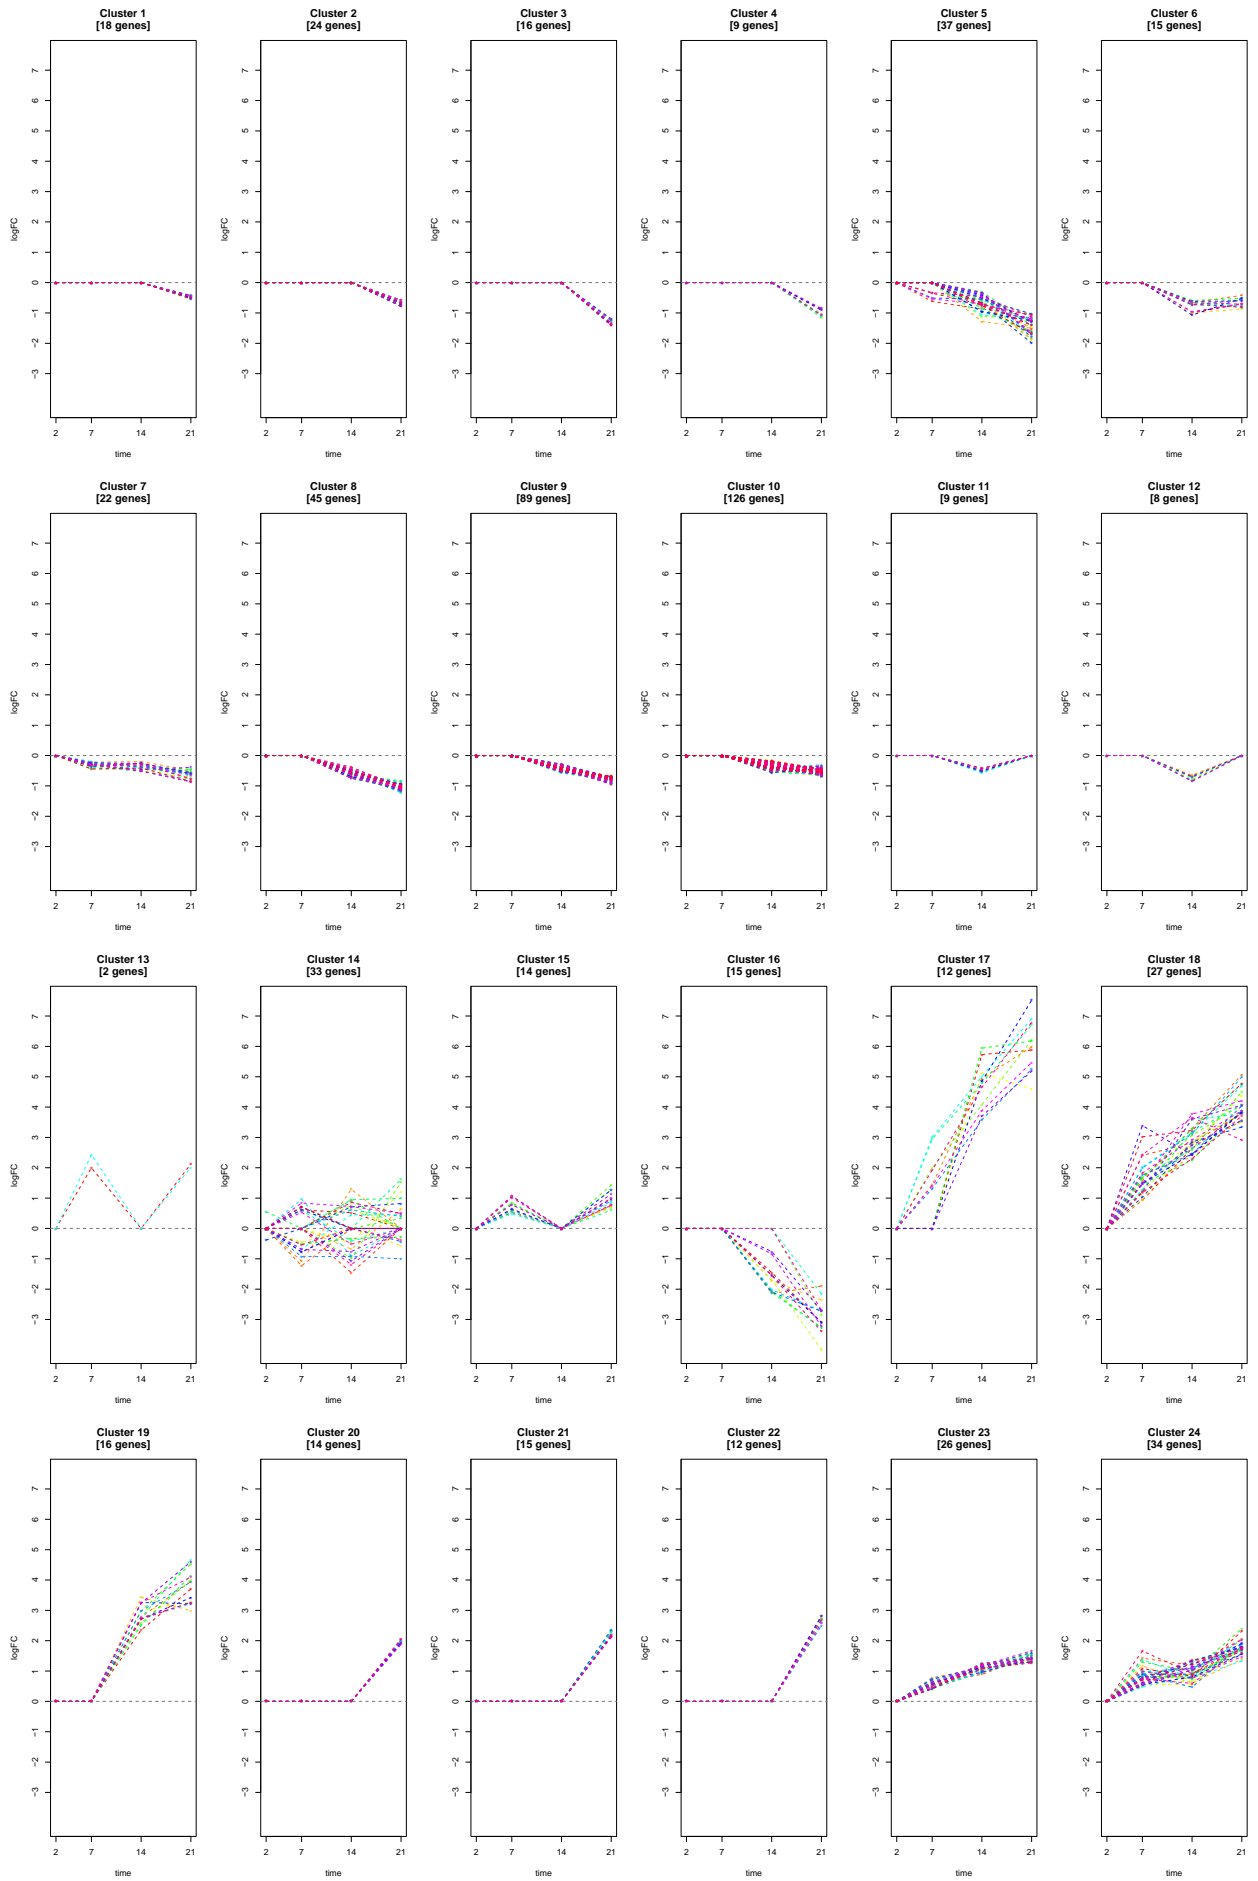

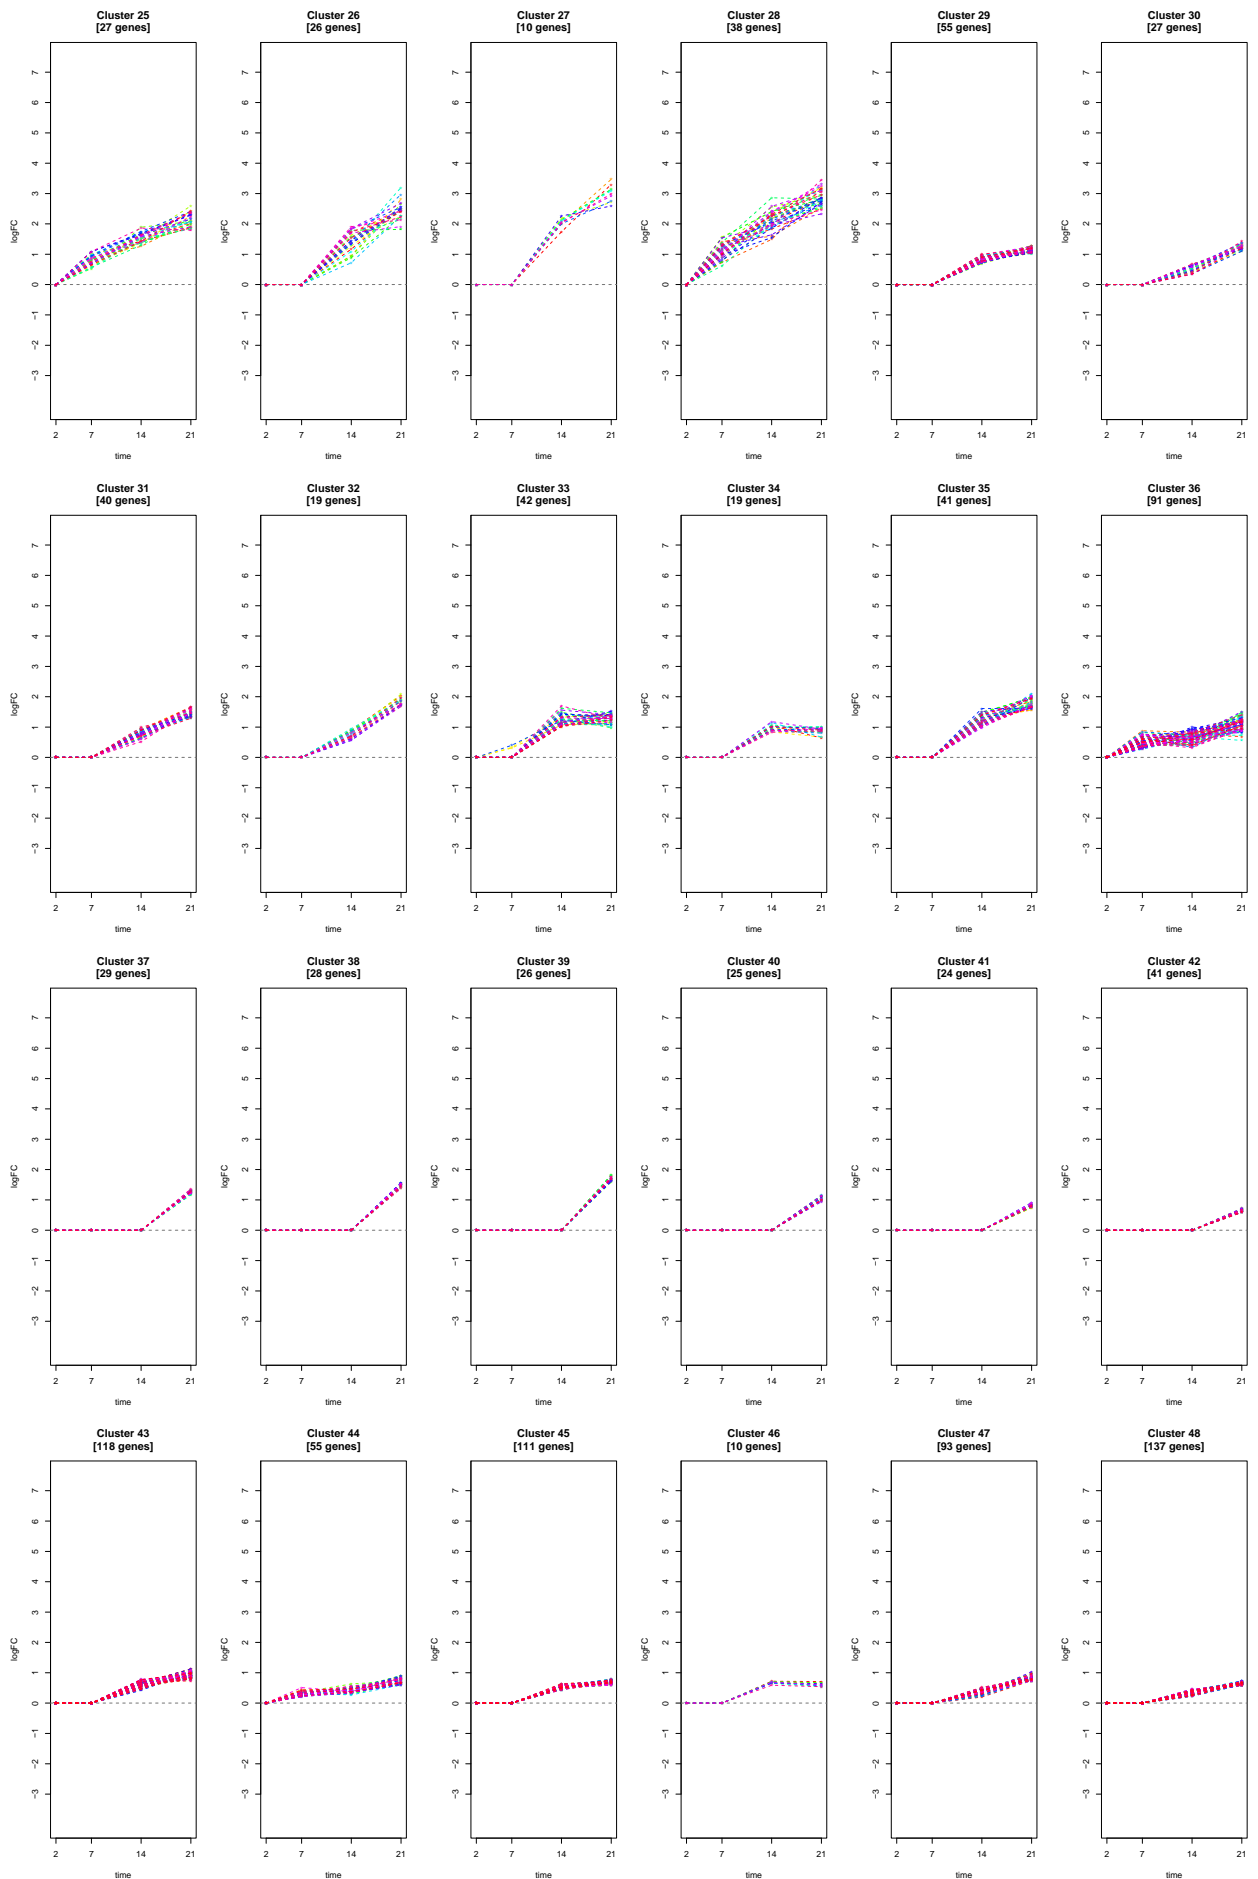

**Additional file 5: Fig. S5. Expression profiles of the tomato gene clusters during TYLCV infection.** DEGs were clustered into 48 groups based on their expression changes during infection. For each cluster the log<sub>2</sub>FC of the DEGs (y axis) are represented during TYLCV infection (x axis, 2, 7, 14 and 21 dpi).
