# Supplementary material for: Transcriptional and epigenetic changes during tomato yellow leaf curl virus infection in tomato
Source: Springer Nature journal article supplement (doi:10.1186/s12870-023-04534-y), 2023-12-18
Supplement: 12870_2023_4534_MOESM6_ESM.pdf [file 12870_2023_4534_MOESM6_ESM.pdf]

**A**

| <i>Upregulated genes at 7, 14 and 21 dpi</i><br><b>PANTHER GO Slim Biological Process</b> | <i>GO terms</i> | <i>Ref-list</i><br><i>(34652)</i> | <i>UP</i><br><i>genes</i> | <i>Expect.</i> | <i>Fold</i><br><i>Enrich.</i> | <i>raw</i><br><i>P-value</i> | <i>FDR</i> |
|-------------------------------------------------------------------------------------------|-----------------|-----------------------------------|---------------------------|----------------|-------------------------------|------------------------------|------------|
| Defense response                                                                          | GO:0006952      | 188                               | 8                         | 1.14           | 7.02                          | 2.69E-05                     | 5.72E-03   |
| Gene silencing by RNA                                                                     | GO:0031047      | 42                                | 4                         | 0.25           | 15.72                         | 1.71E-04                     | 2.54E-02   |

**B**

*Upregulated genes at 7, 14 and 21 dpi*  
**Mapman ontology**

| <i>BIN</i> | <i>BIN name</i>                                     | <i>UP genes</i> | <i>p-value</i> |
|------------|-----------------------------------------------------|-----------------|----------------|
| 20.1       | stress.biotic                                       | 43              | 0.047          |
| 20.1.2     | stress.biotic.receptors                             | 25              | 0.013          |
| 30         | signalling                                          | 49              | 0.047          |
| 30.2       | signalling.receptor kinases                         | 34              | 0.022          |
| 30.2.11    | signalling.receptor kinases.leucine rich repeat XI  | 19              | 7.91E-05       |
| 30.2.12    | signalling.receptor kinases.leucine rich repeat XII | 8               | 0.047          |

**C**

| <i>Upregulated genes at 14 and 21 dpi</i><br><b>PANTHER GO Slim Biological Process</b> | <i>GO terms</i> | <i>Ref-list</i><br><i>(34652)</i> | <i>UP</i><br><i>genes</i> | <i>Expect.</i> | <i>Fold</i><br><i>Enrich.</i> | <i>raw</i><br><i>P-value</i> | <i>FDR</i> |
|----------------------------------------------------------------------------------------|-----------------|-----------------------------------|---------------------------|----------------|-------------------------------|------------------------------|------------|
| Protein autophosphorylation                                                            | GO:0046777      | 75                                | 8                         | 1.49           | 5.37                          | 2.17E-04                     | 1.40E-02   |
| Protein glycosylation                                                                  | GO:0006486      | 42                                | 7                         | 0.83           | 8.39                          | 4.34E-05                     | 5.38E-03   |
| Protein N-linked glycosylation                                                         | GO:0006487      | 33                                | 5                         | 0.66           | 7.63                          | 8.13E-04                     | 3.18E-02   |
| Signal transduction                                                                    | GO:0007165      | 404                               | 26                        | 8.02           | 3.24                          | 4.51E-07                     | 1.12E-04   |
| Localization                                                                           | GO:0051179      | 1160                              | 44                        | 23.03          | 1.91                          | 7.20E-05                     | 6.29E-03   |
| Establishment of localization                                                          | GO:0051234      | 1019                              | 36                        | 20.23          | 1.78                          | 1.36E-03                     | 4.49E-02   |
| Cellular localization                                                                  | GO:0051641      | 579                               | 25                        | 11.50          | 2.17                          | 4.76E-04                     | 2.08E-02   |

**D**

| <i>Downregulated genes at 14 and 21 dpi</i><br><b>PANTHER GO Slim Biological Process</b> | <i>GO terms</i> | <i>Ref-list</i><br><i>(34652)</i> | <i>DW</i><br><i>genes</i> | <i>Expect.</i> | <i>Fold</i><br><i>Enrich.</i> | <i>raw</i><br><i>P-value</i> | <i>FDR</i> |
|------------------------------------------------------------------------------------------|-----------------|-----------------------------------|---------------------------|----------------|-------------------------------|------------------------------|------------|
| Alpha-amino acid metabolic process                                                       | GO:1901605      | 156                               | 7                         | 1.27           | 5.51                          | 3.78E-04                     | 1.44E-02   |
| Cellular homeostasis                                                                     | GO:0019725      | 92                                | 5                         | 0.75           | 6.68                          | 1.16E-03                     | 3.76E-02   |
| Cellular response to oxidative stress                                                    | GO:0034599      | 34                                | 4                         | 0.28           | 14.46                         | 2.47E-04                     | 1.22E-02   |
| Glucose metabolic process                                                                | GO:0006006      | 35                                | 7                         | 0.28           | 24.58                         | 4.39E-08                     | 8.16E-06   |
| Glycolytic process                                                                       | GO:0006096      | 32                                | 4                         | 0.26           | 15.36                         | 2.00E-04                     | 1.06E-02   |
| Hexose biosynthetic process                                                              | GO:0019319      | 18                                | 4                         | 0.15           | 27.31                         | 2.71E-05                     | 2.24E-03   |
| Photosynthesis                                                                           | GO:0015979      | 44                                | 13                        | 0.36           | 36.31                         | 8.35E-16                     | 1.24E-12   |
| Plastid organization                                                                     | GO:0009657      | 56                                | 4                         | 0.46           | 8.78                          | 1.42E-03                     | 4.40E-02   |
| Response to light stimulus                                                               | GO:0009416      | 89                                | 11                        | 0.72           | 15.19                         | 5.85E-10                     | 2.17E-07   |

**Additional file 6: Fig. S6. Functional enrichment of the tomato gene clusters.** A) Gene ontology (GO) terms enriched in upregulated genes at 7, 14 and 21 dpi (corresponding to gene clusters 17,18,23,24,25,28,36) (255 genes). B) MapMan ontology of upregulated genes at 7, 14 and 21 dpi (corresponding to gene clusters 17,18,23,24,25,28,36) (255 genes). C) GO enrichment of upregulated genes at 14 and 21 dpi (corresponding to gene clusters 19 ,26 ,27 ,29 ,30 ,31 ,32 ,33 ,34 ,35, 43 ,45 ,46 ,47 ,48) (764 genes). D) GO enrichment of downregulated genes at 14 and 21 dpi (corresponding to gene clusters 5,6,8,9,10,16) (327 genes). GO analysis using the PANTHER GO-Slim biological process (statistical overrepresentation test). Selected statistically significant biological processes are shown (FDR adjusted p-value  $\leq 0.05$ ) for A), C) and D). MapMan ontology analysis in B) shows selected statistically significant MapMan BINs (Wilcoxon test and Benjamini-Hochberg FDR adjusted p-values  $\leq 0.05$ ).
