# Supplementary material for: Transcriptional and epigenetic changes during tomato yellow leaf curl virus infection in tomato
Source: Springer Nature journal article supplement (doi:10.1186/s12870-023-04534-y), 2023-12-18
Supplement: 12870_2023_4534_MOESM7_ESM.pdf [file 12870_2023_4534_MOESM7_ESM.pdf]

**A**

| DEsiRNAs          | 7 dpi |       |       | 14 dpi |       |       | 21 dpi |       |       |
|-------------------|-------|-------|-------|--------|-------|-------|--------|-------|-------|
|                   | 21-nt | 22-nt | 24-nt | 21-nt  | 22-nt | 24-nt | 21-nt  | 22-nt | 24-nt |
| <i>promoter</i>   | 0     | 1     | 60    | 11     | 2     | 29    | 30     | 10    | 629   |
| <i>gene body</i>  | 2     | 1     | 35    | 24     | 2     | 15    | 65     | 14    | 438   |
| <i>TE/repeats</i> | 20    | 117   | 233   | 22     | 111   | 87    | 53     | 193   | 1162  |

**B**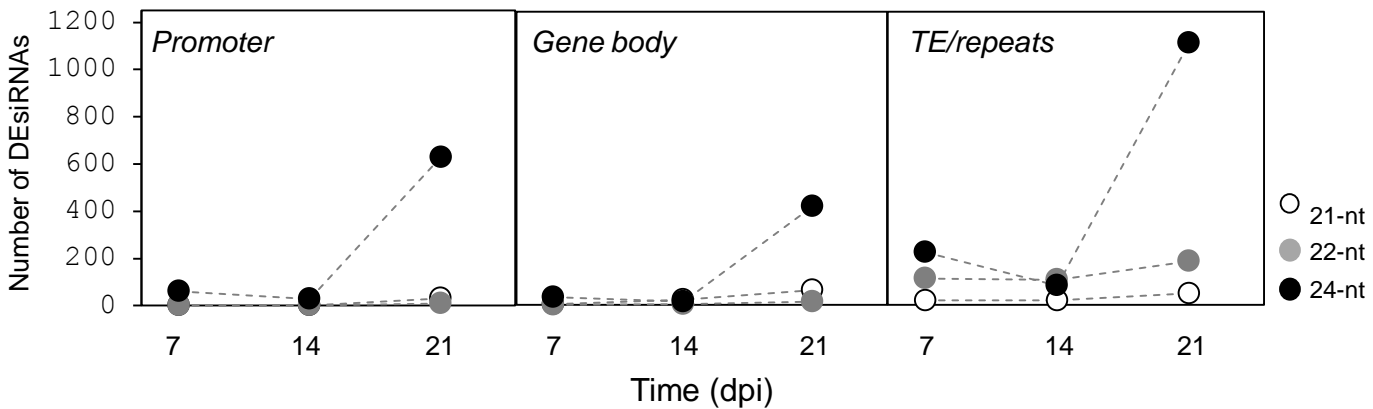

**Additional file 7: Fig. S7. Differentially expressed tomato siRNA loci (DEsiRNAs) overlapped with gene promoters, gene bodies and TE/repeats during TYLCV infection.**

(A) Number of the unique 21-, 22- and 24-nt DEsiRNAs (FDR adjusted p-value < 0.05) that were mapped at promoters (2 kb upstream of transcriptional start site), gene bodies and TE/repeats at 7, 14 and 21 dpi. (B) Dynamic of the 21-, 22- and 24-nt DEsiRNAs that were mapped at promoters, gene bodies and TEs/repeats at 7, 14 and 21 dpi.
