# Supplementary material for: Transcriptional and epigenetic changes during tomato yellow leaf curl virus infection in tomato
Source: Springer Nature journal article supplement (doi:10.1186/s12870-023-04534-y), 2023-12-18
Supplement: 12870_2023_4534_MOESM8_ESM.pdf [file 12870_2023_4534_MOESM8_ESM.pdf]

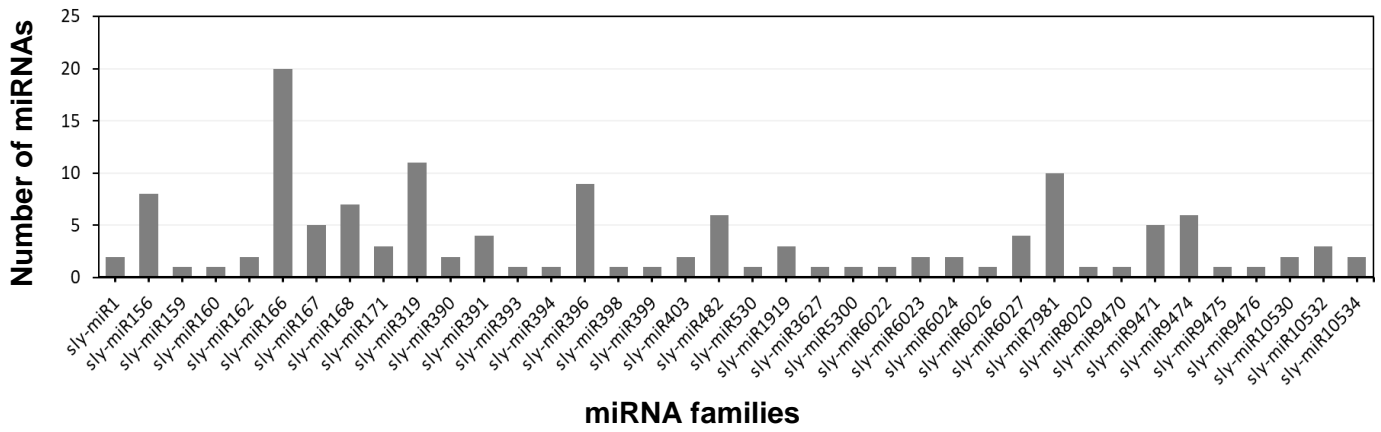

**Additional file 8: Fig. S8. Tomato miRNA families.** Number of unique miRNAs (y axis) from different miRNA families (x axis) are shown detected in the tomato samples (naïve, mock and TYLCV-infected at any dpi). Only miRNAs with at least 10 CPM in both biological replicates in any of the samples were considered.
