# Supplementary material for: Transcriptional and epigenetic changes during tomato yellow leaf curl virus infection in tomato
Source: Springer Nature journal article supplement (doi:10.1186/s12870-023-04534-y), 2023-12-18
Supplement: 12870_2023_4534_MOESM9_ESM.pdf [file 12870_2023_4534_MOESM9_ESM.pdf]

**A****Predicted target genes of DEmiRNA at 21 dpi (TYLCV/mock)**

| <b>PANTHER GO Slim<br/>Biological Process</b> | <b>GO terms</b> | <b>Ref-list<br/>(34652)</b> | <b>Genes</b> | <b>Expect.</b> | <b>Fold<br/>Enrich.</b> | <b>raw<br/>P-value</b> | <b>FDR</b> |
|-----------------------------------------------|-----------------|-----------------------------|--------------|----------------|-------------------------|------------------------|------------|
| Response to stress                            | GO:0006950      | 662                         | 43           | 6.78           | 6.34                    | 5.09E-21               | 9.45E-19   |
| Defense response                              | GO:0006952      | 188                         | 38           | 1.93           | 19.73                   | 8.45E-35               | 1.79E-32   |
| Defense response to<br>other organism         | GO:0098542      | 146                         | 38           | 1.50           | 25.41                   | 2.21E-38               | 8.19E-36   |
| Multicellular organism<br>development         | GO:0007275      | 121                         | 9            | 1.24           | 7.26                    | 7.69E-06               | 5.71E-04   |
| System development                            | GO:0048731      | 95                          | 9            | 0.97           | 9.25                    | 1.21E-06               | 9.97E-05   |
| Shoot system<br>development                   | GO:0048367      | 69                          | 9            | 0.71           | 12.73                   | 1.01E-07               | 8.83E-06   |
| Developmental process                         | GO:0032502      | 196                         | 9            | 2.01           | 4.48                    | 2.66E-04               | 1.72E-02   |
| Anatomical structure<br>morphogenesis         | GO:0009653      | 65                          | 9            | 0.67           | 13.52                   | 6.34E-08               | 5.89E-06   |
| Multicellular organismal<br>process           | GO:0032501      | 124                         | 9            | 1.27           | 7.08                    | 9.25E-06               | 6.55E-04   |
| Morphogenesis of a<br>branching structure     | GO:0001763      | 18                          | 8            | 0.18           | 43.38                   | 1.38E-10               | 1.71E-08   |

**B****Predicted target genes of DEmiRNA at 21 dpi (TYLCV/mock)****Mapman ontology**

| <b>BIN</b>     | <b>BIN name</b>                                    | <b>DEGs</b> | <b>p-value</b> |
|----------------|----------------------------------------------------|-------------|----------------|
| <b>20</b>      | stress                                             | 43          | 0.006          |
| <b>20.1</b>    | stress.biotic                                      | 41          | 0.001          |
| <b>30</b>      | signalling                                         | 18          | 0.029          |
| <b>30.2</b>    | signalling.receptor kinases                        | 15          | 0.009          |
| <b>30.2.11</b> | signalling.receptor kinases.leucine rich repeat XI | 14          | 0.009          |

**Additional file 9: Fig. S9. Functional enrichment of the predicted target genes from the DEmiRNAs in response to TYLCV infection at 21 dpi.** A) Gene ontology (GO) analysis using the PANTHER GO-Slim biological process (statistical overrepresentation test) of all the predicted targets from DEmiRNAs at 21 dpi (684 miRNAs-targets pairs, 470 unique targets). Selected statistically significant biological processes are shown (FDR adjusted p-value  $\leq 0.05$ ). B) MapMan ontology of predicted DE targets of DEmiRNAs at 21 dpi (352 miRNAs-targets pairs, 235 unique targets). Selected statistically significant MapMan BINs are shown (Wilcoxon test and Benjamini-Hochberg FDR adjusted p-values  $\leq 0.05$ ).
