# Supplementary material for: Transcriptional and epigenetic changes during tomato yellow leaf curl virus infection in tomato
Source: Springer Nature journal article supplement (doi:10.1186/s12870-023-04534-y), 2023-12-18
Supplement: 12870_2023_4534_MOESM10_ESM.pdf [file 12870_2023_4534_MOESM10_ESM.pdf]

**A**

| <i>Number of miRNA-target pairs (PARE)</i> |               |               |                  |
|--------------------------------------------|---------------|---------------|------------------|
| <i>miRNA</i>                               | <i>Target</i> | <i>14 dpi</i> | <i>21 dpi</i>    |
| DW                                         | UP            | 1             | 17 (39%)         |
| UP                                         | DW            | 0             | 0                |
| DW                                         | DW            | 0             | 0                |
| UP                                         | UP            | 0             | 12 (28%)         |
| DW                                         | nc            | 1             | 9 (21%)          |
| UP                                         | nc            | 1             | 5 (12%)          |
| <b>TOTAL</b>                               |               | <b>3</b>      | <b>43 (100%)</b> |

**B**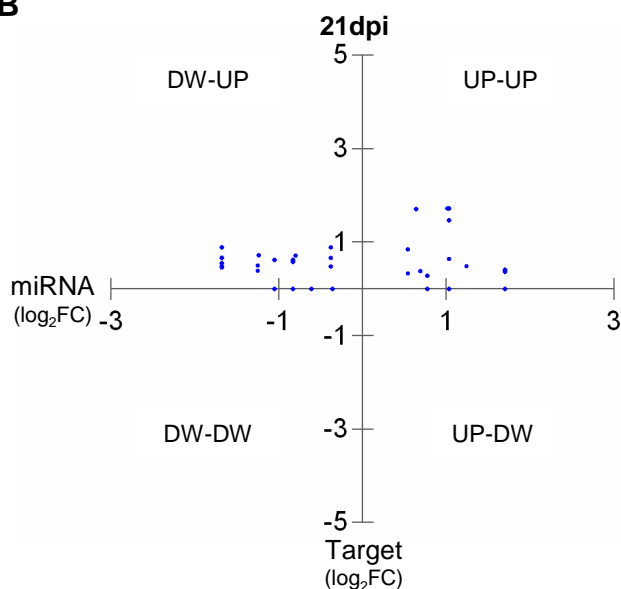

**Additional file 10: Fig. S10. Expression levels of the DE miRNAs and their predicted target genes in tomato according to the degradome analysis.** A) Classification based on their expression levels at 14 and 21 dpi of the miRNA-target pairs according to degradome's data [82]. UP: upregulation, DW: downregulation, nc (no changes): target gene not differentially expressed. B) Expression level ( $\log_2FC$  for the ratio TYLCV/mock) at 21 dpi of the DE miRNAs (x axis) and their target genes (y axis). Only targets with a degradome category  $\leq 3$  and a p-value  $\leq 0.05$  are shown.
