# Supplementary material for: Transcriptional and epigenetic changes during tomato yellow leaf curl virus infection in tomato
Source: Springer Nature journal article supplement (doi:10.1186/s12870-023-04534-y), 2023-12-18
Supplement: 12870_2023_4534_MOESM11_ESM.pdf [file 12870_2023_4534_MOESM11_ESM.pdf]

**A****Predicted target genes of DEphasiRNA at 21 dpi (TYLCV/mock)****PANTHER GO. Slim****Biological Process**

|                                            | <b>GO terms</b> | <b>Ref-list<br/>(34652)</b> | <b>Genes</b> | <b>Expect.</b> | <b>Fold<br/>enrich.</b> | <b>raw<br/>P-value</b> | <b>FDR</b> |
|--------------------------------------------|-----------------|-----------------------------|--------------|----------------|-------------------------|------------------------|------------|
| Response to stress                         | GO:0006950      | 662                         | 99           | 28.45          | 3.48                    | 3.97E-24               | 1.97E-21   |
| Defence response                           | GO:0006952      | 188                         | 48           | 8.08           | 5.94                    | 3.24E-20               | 4.38E-18   |
| Defence response to other organism         | GO:0098542      | 146                         | 46           | 6.27           | 7.33                    | 1.59E-22               | 2.94E-20   |
| Negative regulation of gene expression     | GO:0010629      | 131                         | 15           | 5.63           | 2.66                    | 1.06E-03               | 2.71E-02   |
| Post-transcriptional gene silencing by RNA | GO:0035194      | 42                          | 8            | 1.80           | 4.43                    | 9.36E-04               | 2.53E-02   |
| Cell cycle                                 | GO:0007049      | 264                         | 26           | 11.34          | 2.29                    | 2.54E-04               | 1.18E-02   |
| Mitotic cell cycle                         | GO:0000278      | 191                         | 19           | 8.21           | 2.32                    | 1.32E-03               | 3.21E-02   |
| Mitotic sister chromatid segregation       | GO:0000070      | 47                          | 8            | 2.02           | 3.96                    | 1.77E-03               | 3.99E-02   |
| Mitotic sister chromatid cohesion          | GO:0007064      | 21                          | 6            | 0.90           | 6.65                    | 6.80E-04               | 2.30E-02   |
| Cell wall biogenesis                       | GO:0042546      | 72                          | 10           | 3.09           | 3.23                    | 1.97E-03               | 4.19E-02   |
| Cell division                              | GO:0051301      | 37                          | 7            | 1.59           | 4.40                    | 2.00E-03               | 4.19E-02   |
| ph reduction                               | GO:0045851      | 6                           | 5            | 0.26           | 19.39                   | 4.42E-05               | 3.29E-03   |
| Vacuolar acidification                     | GO:0007035      | 6                           | 5            | 0.26           | 19.39                   | 4.42E-05               | 3.13E-03   |
| Localization                               | GO:0051179      | 1160                        | 75           | 49.85          | 1.50                    | 9.88E-04               | 2.58E-02   |
| Establishment of localization              | GO:0051234      | 1019                        | 70           | 43.79          | 1.60                    | 2.57E-04               | 1.16E-02   |
| Transport                                  | GO:0006810      | 1005                        | 70           | 43.18          | 1.62                    | 1.72E-04               | 9.13E-03   |

**B****Predicted target genes of DEphasiRNA at 21 dpi (TYLCV/mock)****Mapman ontology**

| <b>BIN</b>       | <b>BIN name</b>                                                                     | <b>DEGs</b> | <b>p-value</b> |
|------------------|-------------------------------------------------------------------------------------|-------------|----------------|
| <b>20</b>        | stress                                                                              | 122         | 3.55E-07       |
| <b>20.1</b>      | stress.biotic                                                                       | 77          | 6.14E-11       |
| <b>20.1.2</b>    | stress.biotic.receptors                                                             | 57          | 3.55E-11       |
| <b>26</b>        | misc                                                                                | 135         | 0.002          |
| <b>26.12</b>     | misc.peroxidases                                                                    | 12          | 0.004          |
| <b>29.4.1.57</b> | protein.postranslational modification.kinase.receptor like cytoplasmatic kinase VII | 28          | 0.013          |
| <b>30</b>        | signalling                                                                          | 136         | 1.09E-05       |
| <b>30.2</b>      | signalling.receptor kinases                                                         | 71          | 6.14E-11       |
| <b>30.2.11</b>   | signalling.receptor kinases.leucine rich repeat XI                                  | 38          | 1.21E-08       |
| <b>30.2.12</b>   | signalling.receptor kinases.leucine rich repeat XII                                 | 18          | 3.86E-05       |
| <b>30.2.17</b>   | signalling.receptor kinases.DUF 26                                                  | 19          | 0.001          |
| <b>30.2.24</b>   | signalling.receptor kinases.S-locus glycoprotein like                               | 11          | 0.002          |

**Additional file 11: Fig. S11. Functional enrichment of putative targets of the DEphasiRNAs upon TYLCV infection at 21 dpi.** A) Gene ontology (GO) analysis using the PANTHER GO-Slim biological process (statistical overrepresentation test) of all the predicted targets for the DEphasiRNA at 21 dpi (2697 DEphasiRNAs-target pairs, 2154 unique targets). Selected statistically significant biological process are shown (FDR adjusted p-value  $\leq 0.05$ ). B) MapMan ontology of predicted DE targets of DEphasiRNA at 21 dpi (1097 phasiRNAs-targets pairs, 923 unique targets). Selected statistically significant MapMan BINs are shown (Wilcoxon test and Benjamini-Hochberg correction adjusted p-values  $\leq 0.05$ ).
