# Supplementary material for: Transcriptional and epigenetic changes during tomato yellow leaf curl virus infection in tomato
Source: Springer Nature journal article supplement (doi:10.1186/s12870-023-04534-y), 2023-12-18
Supplement: 12870_2023_4534_MOESM12_ESM.pdf [file 12870_2023_4534_MOESM12_ESM.pdf]

**A**

| <i>Number of phasiRNA-target pairs (PARE)</i> |               |              |               |
|-----------------------------------------------|---------------|--------------|---------------|
| <i>phasiRNA</i>                               | <i>Target</i> | <i>14dpi</i> | <i>21 dpi</i> |
| <i>DW</i>                                     | <i>UP</i>     | 0            | 40 (31%)      |
| <i>UP</i>                                     | <i>DW</i>     | 3            | 12 (9%)       |
| <i>DW</i>                                     | <i>DW</i>     | 0            | 10 (8%)       |
| <i>UP</i>                                     | <i>UP</i>     | 6            | 37 (29%)      |
| <i>DW</i>                                     | <i>nc</i>     | 1            | 18 (14%)      |
| <i>UP</i>                                     | <i>nc</i>     | 7            | 12 (9%)       |
| <b><i>TOTAL</i></b>                           |               | 17           | 129 (100%)    |

**B**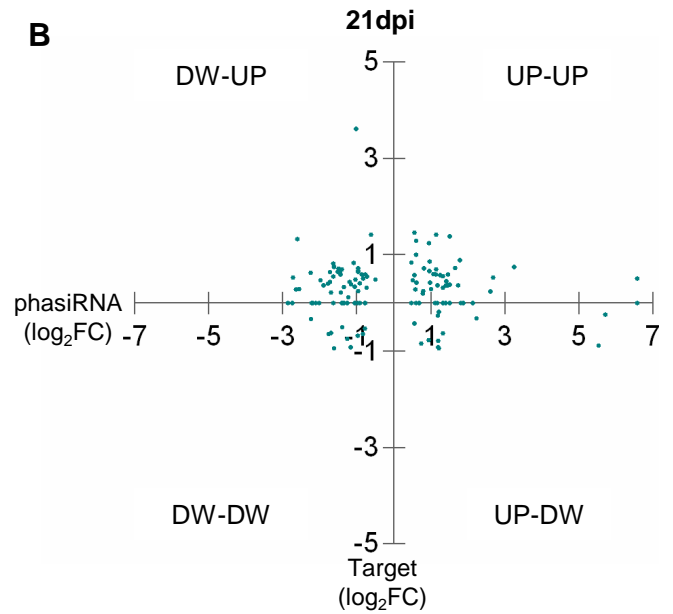

**Additional file 12: Fig. S12. Expression levels of the DE phasiRNAs and their predicted target genes in tomato according to the degradome analysis.** A) Classification based on their expression levels at 14 and 21 dpi of the phasiRNA-target pairs according to degradome's data [82]. UP: upregulation, DW: downregulation, nc (no changes): target gene not differentially expressed. B) Expression level (log<sub>2</sub>FC for the ratio TYLCV/mock) at 21 dpi of the DEphasiRNAs (x axis) and their target genes (y axis). Only targets with a degradome category ≤ 3 and a p-value ≤ 0.05 are shown.
