# Supplementary material for: Transcriptional and epigenetic changes during tomato yellow leaf curl virus infection in tomato
Source: Springer Nature journal article supplement (doi:10.1186/s12870-023-04534-y), 2023-12-18
Supplement: 12870_2023_4534_MOESM14_ESM.pdf [file 12870_2023_4534_MOESM14_ESM.pdf]

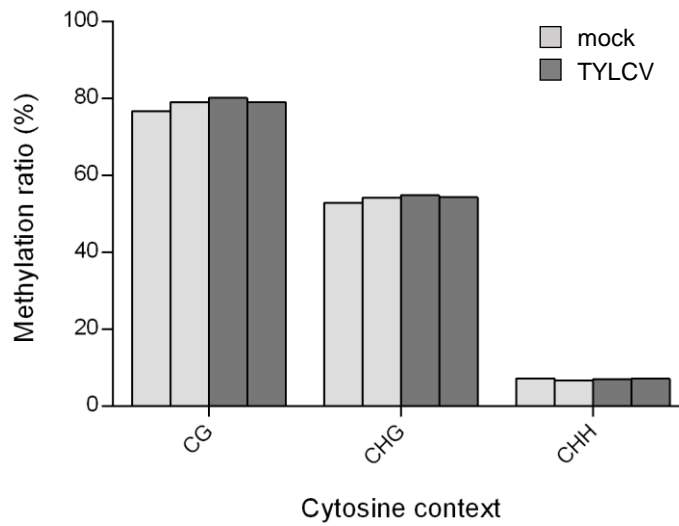

**Additional file 14: Fig. S14. Percentage of DNA methylation at the three cytosine contexts (CG, CHG, CHH).** Data from the two different biological replicates from TYLCV-tomato infected plants (dark grey) and control plants (mock, light grey) at 14 dpi are shown.
